# Supplementary material for: Effects of active referral combined with a small financial incentive on smoking cessation: study protocol for a cluster randomised controlled trial
Source: PubMed Central journal article supplement — BMJ Open. 2020 Oct 26;10(10):e038351. doi: 10.1136/bmjopen-2020-038351 (PMC7592296; doi:10.1136/bmjopen-2020-038351), 2020-10-26
Supplement: bmjopen-2020-038351supp001.pdf [file bmjopen-2020-038351supp001.pdf]

Appendix 1 Referral card

方便 有效 免費

「戒煙大贏家」無煙社區計劃  
http://www.quittowin.hk/

## 戒煙熱線咭

Quit now 立即戒煙 綜合戒煙熱線 1833 183

舉辦機構：  
 LKS Faculty of Medicine School of Nursing 香港大學護理學院  
 LKS Faculty of Medicine School of Public Health 香港大學公共衛生學院  


網站：www.tco.gov.hk/ 1833 183 按1字

## 衛生署戒煙熱線

★ 所有電話均由註冊護士接聽 家庭醫學深造培訓中心 牛頭角賽馬會診所2樓

- ✓ 專業電話輔導
- ✓ 辦公時間：星期一至五（上午九時至下午六時）
- ✓ 在辦公時間外則由電腦化的電話系統作出處理
- ✓ 尼古丁依賴度測試
- ✓ 戒煙資訊傳真
- ✓ 戒煙者可預約參與為期八至十二個月，共四次輔導跟進

網站：lscsc.tungwahcsd.org 1833 183 按2字

## 東華三院戒煙熱線

直線：2332 8977

★ 提供免費尼古丁替代及藥物治療 服務中心 灣仔、觀塘、將軍澳、荃灣、沙田及屯門

- ✓ 專業電話輔導
- ✓ 辦公時間：星期一至六（上午九時至下午五時三十分）
- ✓ 尼古丁成癮評估 (服務處開放時間各有不同)
- ✓ 戒煙服務資訊及解答
- ✓ 戒煙輔助藥物的查詢
- ✓ 戒煙者可預約參與為期兩個月，共四次面談及醫療跟進

網站：www.ha.org.hk 1833 183 按3字

## 醫院管理局無煙熱線

直線：2300 7272

★ 享用尼古丁補充療法不另加收費 (只需繳付門診診金)

全港18區普通科門診、健康中心及醫院

- ✓ 專業電話輔導
- ✓ 辦公時間：星期一至五（上午九時至下午五時）  
星期六（上午九時至下午一時）
- ✓ 提供具備實證成效的戒煙治療及輔導
- ✓ 定期提供面談或電話輔導跟進

網站：www.pokoi.org.hk 1833 183 按4字

## 博愛醫院

直線：2607 1222

★ 提供免費針灸戒煙服務 全港18區專科診所及中心、教研中心及流動醫療車

- ✓ 專業電話輔導
- ✓ 辦公時間：星期一至六（上午九時至下午六時）
- ✓ 傳統中醫藥戒煙的先導計劃
- ✓ 戒煙輔導
- ✓ 連續三星期，每星期兩次跟進

網站：nursing.hku.hk/yquit 1833 183 按5字

## 青少年戒煙熱線

直線：2855 9557或5111 4333

(香港大學及衛生署控煙辦公室合辦)

★ 6個月後成功戒煙及通過測試者可獲獎金港幣三百元 由曾接受特別訓練的年青輔導員接聽

- ✓ 對象：12-25歲的青少年
- ✓ 專業電話輔導
- ✓ 辦公時間：星期一至五（下午五時至九時）  
星期六及日（下午二時至八時）
- ✓ 提供度身訂造電話戒煙輔導

## Appendix 2 Referral form

Referral consent form - QTW2018 (Last Update: 30/05/2018, version 1)

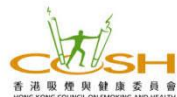

### 第九屆「戒煙大贏家」無煙社區計劃 戒煙承諾書（舉辦機構存檔）

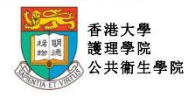

我，\_\_\_\_\_（姓名），承諾於 2018 年\_\_月\_\_日起，決心戒煙，並同意獲轉介至下列戒煙服務以作跟進。

- |                                          |                                          |
|------------------------------------------|------------------------------------------|
| <input type="checkbox"/> 1. 東華三院綜合戒煙服務中心 | <input type="checkbox"/> 2. 博愛醫院中醫針灸戒煙服務 |
| <input type="checkbox"/> 3. 衛生署戒煙輔導服務    | <input type="checkbox"/> 4. 醫院管理局戒煙輔導服務  |
| <input type="checkbox"/> 5. 香港大學青少年戒煙熱線  |                                          |

**三個月內參與最少一次戒煙輔導，核實後可獲超市現金券\$300。**

參加者聲明：

- 本人明白資料將由香港大學護理學院及公共衛生學院轉交至上述之戒煙熱線作跟進之用。
- 本人明白於三個月內參與最少一次由上述機構提供的戒煙輔導後可獲得三百元超市現金券。
- 本人明白香港大學將在本人簽署承諾書後的六個月內跟進本人之戒煙情況。
- 本人確保承諾書上之資料皆屬真實及正確。

姓名：\_\_\_\_\_ 年齡：\_\_\_\_\_ 歲 一氧化碳讀數：\_\_\_\_\_ ppm

性別：男 女 聯絡電話：\_\_\_\_\_

簽名：\_\_\_\_\_ 日期：\_\_\_\_\_

收集個人資料聲明：

- 根據香港法律《個人資料(私隱)條例》(第 486 章)，所有收集的資料會絕對保密，例如在本項研究中或與本項研究有關的個人資料的收集、保管、保留、管理、控制、使用(分析或比較)、在香港內外轉讓、不披露、消除和/或任何方式處理。
- 參加者有權要求查詢及更正由香港吸煙與健康委員會持有之個人資料。有關要求，可以書面郵寄至「香港灣仔皇后大道東 183 號合和中心 44 樓 4402-03 室」，向香港吸煙與健康委員會提出。

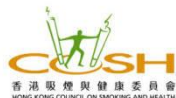

### 第九屆「戒煙大贏家」無煙社區計劃 戒煙承諾書（參加者保存）

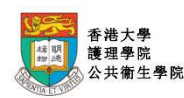

我承諾於 2018 年\_\_月\_\_日起，決心戒煙，並同意獲轉介至下列戒煙服務以作跟進。

- |                                          |                                          |
|------------------------------------------|------------------------------------------|
| <input type="checkbox"/> 1. 東華三院綜合戒煙服務中心 | <input type="checkbox"/> 2. 博愛醫院中醫針灸戒煙服務 |
| <input type="checkbox"/> 3. 衛生署戒煙輔導服務    | <input type="checkbox"/> 4. 醫院管理局戒煙輔導服務  |
| <input type="checkbox"/> 5. 香港大學青少年戒煙熱線  |                                          |

**三個月內參與最少一次戒煙輔導，核實後可獲超市現金券\$300。**

參加者聲明：

- 本人明白資料將由香港大學護理學院及公共衛生學院轉交至上述之戒煙熱線作跟進之用。
- 本人明白於三個月內參與最少一次由上述機構提供的戒煙輔導後可獲得三百元超市現金券。
- 本人明白香港大學將在本人簽署承諾書後的六個月內跟進本人之戒煙情況。
- 本人確保承諾書上之資料皆屬真實及正確。

一氧化碳讀數：\_\_\_\_\_ ppm

收集個人資料聲明：

- 根據香港法律《個人資料(私隱)條例》(第 486 章)，所有收集的資料會絕對保密，例如在本項研究中或與本項研究有關的個人資料的收集、保管、保留、管理、控制、使用(分析或比較)、在香港內外轉讓、不披露、消除和/或任何方式處理。
- 參加者有權要求查詢及更正由香港吸煙與健康委員會持有之個人資料。有關要求，可以書面郵寄至「香港灣仔皇后大道東 183 號合和中心 44 樓 4402-03 室」，向香港吸煙與健康委員會提出。

## Appendix 3 Participant's consent form

Appendix 7 - Information sheet and consent form - QTW2018

[Last Update: 28/05/2018, version 1]

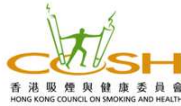

## 第九屆「戒煙大贏家」無煙社區計劃

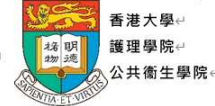

## 參加者自願參加同意書

香港大學護理學院及公共衛生學院受香港吸煙與健康委員會委託，現正進行一項為吸煙者提供即場輔導跟進及獎勵戒煙的「戒煙大贏家」比賽和隨機對照研究。如果你願意參與這項比賽和研究，請你填寫一份關於吸煙情況的問卷。我們會即場測量你的一氧化碳水平及提供戒煙輔導，整個輔導過程大約需時 5 分鐘。我們亦會提供有關戒煙的資料，包括介紹一些戒煙方法及吸煙的害處等。

如果你同意參與這項研究，你將會被以 1:1 比例隨機分配到兩種戒煙輔導組之中的任一組。你會於第一、第二、第三及第六個月，接收到共 4 次電話跟進訪問和計劃的資訊，每次電話跟進過程大約需時 8 分鐘。若你成功完成所有跟進活動，則可以獲得現金獎港幣 \$100。此外，如你於第三及六個月跟進訪問時已經戒煙 7 天或以上，我們將邀請你進行一氧化碳及可的寧水平測量，以核實成功戒煙。核實測量內容：用一氧化碳測定儀量度你呼氣中的一氧化碳水平及使用可的寧測試紙測量你吐出的口水中的可的寧水平。

這項研究絕對安全，不會令你產生不安。根據香港法律《個人資料(私隱)條例》(第 486 章)，所有收集的資料會絕對保密，例如在本項研究中或與本項研究有關的個人資料的收集、保管、保留、管理、控制、使用(分析或比較)、在香港內外轉讓、不披露、消除和/或任何方式處理。此研究已經由香港大學及醫管局港島西醫院聯網研究倫理委員會審閱及批准。你可以選擇是否參與這項研究及有權隨時退出而不影響我們提供之服務。香港大學護理學院及公共衛生學院保留任何爭議的最終決定權。如果你希望知道你本人的測試結果或對整項研究結果或有任何疑問，請聯絡我們的研究團隊：

計劃總監：王文炳博士 → 電話：3917-6636

計劃統籌：翁...雪博士 → 電話：3917-6304 → 劉正彥先生 → 電話 3917-6951

| (請在適當方格填上√): |                                                                     | 是                        | 否                        |
|--------------|---------------------------------------------------------------------|--------------------------|--------------------------|
| 1.           | 本人已閱畢及明白上述資料，及有機會對這項研究提出查詢。                                         | <input type="checkbox"/> | <input type="checkbox"/> |
| 2.           | 本人自願參與是項研究，並知道有權隨時退出，不用作出任何解釋。這將不會影響本人所接受的服務或權益。                    | <input type="checkbox"/> | <input type="checkbox"/> |
| 3.           | 本人明白所有個人資料會完全保密，只有授權主要研究者及其研究團隊和香港大學及醫管局港島西醫院聯網研究倫理委員會獲得，並只會用於研究用途。 | <input type="checkbox"/> | <input type="checkbox"/> |
| 4.           | 我同意參與這項研究，並同意研究員日後聯絡我，以便跟進。                                         | <input type="checkbox"/> | <input type="checkbox"/> |

|               |    |    |
|---------------|----|----|
| 被訪者姓名 (請用正楷)  | 簽署 | 日期 |
| 研究員姓名 (請用正楷)  | 簽署 | 日期 |
| 王文炳博士         |    |    |
| 計劃總監姓名 (請用正楷) | 簽署 | 日期 |
